# Supplementary material for: Evidence in support of chromosomal sex influencing plasma based metabolome vs APOE genotype influencing brain metabolome profile in humanized APOE male and female mice
Source: PLoS One. 2020 Jan 9;15(1):e0225392. doi: 10.1371/journal.pone.0225392 (PMC6952084; doi:10.1371/journal.pone.0225392)
Supplement: S2 Table — (XLSX) [file pone.0225392.s002.xlsx]

## Sheet: Cortex_Plate1
Sample Identification	Group	C0	C2	C3	C3-DC (C4-OH)	C3-OH	C3:1	C4	C4:1	C5	C5-DC (C6-OH)	C5-M-DC	C5-OH (C3-DC-M)	C5:1	C5:1-DC	C6 (C4:1-DC)	C6:1	C7-DC	C8	C9	C10	C10:1	C10:2	C12	C12-DC	C12:1	C14	C14:1	C14:1-OH	C14:2	C14:2-OH	C16	C16-OH	C16:1	C16:1-OH	C16:2	C16:2-OH	C18	C18:1	C18:1-OH	C18:2	Ala	Arg	Asn	Asp	Cit	Gln	Glu	Gly
		Acylcarnitine	Acylcarnitine	Acylcarnitine	Acylcarnitine	Acylcarnitine	Acylcarnitine	Acylcarnitine	Acylcarnitine	Acylcarnitine	Acylcarnitine	Acylcarnitine	Acylcarnitine	Acylcarnitine	Acylcarnitine	Acylcarnitine	Acylcarnitine	Acylcarnitine	Acylcarnitine	Acylcarnitine	Acylcarnitine	Acylcarnitine	Acylcarnitine	Acylcarnitine	Acylcarnitine	Acylcarnitine	Acylcarnitine	Acylcarnitine	Acylcarnitine	Acylcarnitine	Acylcarnitine	Acylcarnitine	Acylcarnitine	Acylcarnitine	Acylcarnitine	Acylcarnitine	Acylcarnitine	Acylcarnitine	Acylcarnitine	Acylcarnitine	Acylcarnitine	Amino acid	Amino acid	Amino acid	Amino acid	Amino acid	Amino acid	Amino acid	Amino acid
Cortex3101	ApoE 4 Female	47.1	9.1	0.169	0.159	0.02	0.015	0.12	0.014	0.121	0.036	0.022	0.171	0.027	0.016	0.028	0.018	0.012	0.056	0.011	0.037	0.307	0.087	0.072	0.045	0.209	0.27	0.014	0.016	0.01	0.009	0.458	0.013	0.085	0.017	0.01	0.021	0.065	0.236	0.021	0.016	413	50.9	48.1	1088	4.75	3923	2946	485
Cortex3103	ApoE 4 Female	43.3	8.82	0.162	0.143	0.02	0.018	0.112	0.02	0.112	0.039	0.02	0.164	0.024	0.014	0.024	0.016	0.013	0.054	0.013	0.036	0.379	0.083	0.07	0.045	0.255	0.244	0.013	0.015	0.01	0.01	0.447	0.013	0.075	0.014	0.009	0.019	0.085	0.212	0.02	0.013	449	44.4	48	811	2.85	3402	3233	409
Cortex7574	ApoE 3 Female	31.7	9.01	0.217	0.122	0.018	0.012	0.154	0.017	0.115	0.038	0.021	0.14	0.027	0.016	0.027	0.017	0.013	0.055	0.01	0.035	0.322	0.078	0.082	0.044	0.233	0.316	0.017	0.014	0.011	0.009	0.544	0.01	0.107	0.015	0.009	0.022	0.081	0.304	0.024	0.02	389	36.6	27.1	918	1.82	2924	3044	320
Cortex7577	ApoE 3 Female	27.4	8.71	0.178	0.123	0.016	0.015	0.167	0.016	0.096	0.035	0.02	0.125	0.022	0.016	0.029	0.013	0.011	0.051	0.01	0.038	0.124	0.074	0.071	0.041	0.092	0.238	0.013	0.012	0.011	0.008	0.377	0.011	0.085	0.014	0.009	0.021	0.052	0.221	0.019	0.019	377	31.2	25.3	756	0.199	2830	3489	272
Cortex7581	ApoE 3 Male	24.8	7.07	0.17	0.113	0.018	0.015	0.146	0.016	0.087	0.03	0.021	0.114	0.024	0.016	0.027	0.016	0.012	0.056	0.012	0.037	0.364	0.071	0.065	0.043	0.255	0.231	0.011	0.015	0.01	0.008	0.482	0.008	0.073	0.016	0.009	0.02	0.106	0.232	0.022	0.013	283	31.5	17.9	700	1.27	2809	2245	265
Cortex7606	ApoE 3 Female	27.1	7.62	0.183	0.13	0.019	0.016	0.147	0.016	0.106	0.039	0.025	0.132	0.023	0.016	0.028	0.015	0.013	0.056	0.01	0.04	0.198	0.068	0.066	0.041	0.13	0.229	0.013	0.012	0.01	0.008	0.432	0.012	0.076	0.012	0.01	0.02	0.069	0.227	0.019	0.019	307	34.3	26.1	739	1.6	3434	2860	311
Cortex7609	ApoE 3 Male	32	8.74	0.131	0.128	0.018	0.016	0.114	0.015	0.103	0.038	0.022	0.135	0.023	0.015	0.028	0.015	0.012	0.049	0.011	0.038	0.169	0.077	0.07	0.044	0.127	0.226	0.013	0.013	0.011	0.008	0.389	0.013	0.074	0.013	0.011	0.021	0.074	0.201	0.022	0.02	375	38.4	30	900	4.41	3857	3460	344
Cortex7612	ApoE 3 Male	34.6	8.71	0.205	0.15	0.02	0.017	0.118	0.023	0.127	0.043	0.023	0.151	0.029	0.017	0.028	0.018	0.013	0.055	0.014	0.041	0.236	0.086	0.071	0.043	0.159	0.249	0.014	0.016	0.013	0.011	0.451	0.017	0.082	0.017	0.013	0.021	0.091	0.232	0.03	0.023	438	33.3	39.5	876	2.36	3529	3138	387
Cortex7617	ApoE 4 Female	35.8	7.83	0.111	0.146	0.016	0.014	0.152	0.018	0.107	0.032	0.021	0.144	0.023	0.013	0.028	0.015	0.013	0.053	0.01	0.036	0.262	0.076	0.064	0.04	0.179	0.243	0.012	0.011	0.01	0.007	0.423	0.011	0.083	0.014	0.011	0.018	0.061	0.231	0.02	0.02	355	37.3	35.6	944	232	3182	3555	338
Cortex7635	ApoE 4 Male	45.5	9.85	0.108	0.152	0.018	0.016	0.132	0.017	0.092	0.039	0.026	0.159	0.027	0.014	0.024	0.015	0.012	0.059	0.009	0.037	0.345	0.075	0.073	0.043	0.243	0.269	0.013	0.015	0.012	0.008	0.46	0.013	0.094	0.014	0.012	0.019	0.065	0.268	0.023	0.017	323	57.1	43.5	876	0.856	2897	2589	423
Cortex7637	ApoE 4 Male	46.2	9.35	0.132	0.143	0.02	0.016	0.111	0.019	0.11	0.04	0.021	0.188	0.025	0.015	0.028	0.017	0.011	0.056	0.008	0.041	0.311	0.081	0.067	0.042	0.217	0.251	0.012	0.014	0.013	0.008	0.475	0.012	0.083	0.017	0.01	0.019	0.079	0.241	0.028	0.017	409	60	41.5	697	3.25	3712	3171	492
Cortex7641	ApoE 4 Male	45.5	8.32	0.121	0.126	0.021	0.015	0.117	0.017	0.119	0.036	0.02	0.164	0.024	0.013	0.027	0.016	0.012	0.057	0.012	0.04	0.377	0.091	0.074	0.043	0.251	0.282	0.013	0.015	0.011	0.009	0.47	0.012	0.094	0.016	0.011	0.022	0.063	0.262	0.026	0.021	406	64.9	40.9	988	1.36	3868	3044	440
Cortex7659	ApoE 3 Male	40.3	8.79	0.162	0.143	0.026	0.017	0.109	0.015	0.118	0.044	0.021	0.156	0.028	0.015	0.026	0.017	0.013	0.057	0.012	0.038	0.271	0.079	0.072	0.042	0.19	0.288	0.014	0.014	0.013	0.01	0.494	0.011	0.096	0.015	0.01	0.02	0.071	0.263	0.025	0.014	356	62.8	37.8	996	2.81	3412	3020	406
Cortex7662	ApoE 3 Female	26.9	7.6	0.157	0.144	0.018	0.02	0.193	0.017	0.101	0.036	0.019	0.124	0.028	0.013	0.028	0.013	0.009	0.051	0.01	0.035	0.34	0.08	0.071	0.043	0.228	0.242	0.013	0.011	0.011	0.01	0.377	0.008	0.081	0.015	0.011	0.021	0.049	0.24	0.019	0.013	296	47.3	31.7	736	0.041	3367	2452	282
Cortex7670	ApoE 3 Male	38.7	8.77	0.163	0.154	0.017	0.017	0.146	0.017	0.109	0.04	0.021	0.144	0.019	0.013	0.022	0.017	0.012	0.055	0.011	0.032	0.241	0.069	0.057	0.038	0.163	0.238	0.011	0.011	0.01	0.007	0.328	0.008	0.074	0.013	0.009	0.017	0.053	0.185	0.017	0.014	450	44.6	41.7	731	0.573	3548	4026	389
Cortex7673	ApoE 3 Female	40.2	6.43	0.147	0.118	0.026	0.017	0.079	0.016	0.075	0.048	0.022	0.142	0.024	0.016	0.022	0.015	0.011	0.055	0.01	0.038	0.309	0.081	0.053	0.046	0.209	0.248	0.008	0.013	0.01	0.007	0.43	0.013	0.069	0.015	0.008	0.02	0.073	0.214	0.021	0.013	509	76	41.5	845	2.83	3325	2612	466
Cortex7711	ApoE 4 Male	40.9	6.94	0.132	0.12	0.015	0.014	0.11	0.013	0.106	0.035	0.022	0.149	0.025	0.015	0.023	0.015	0.012	0.052	0.01	0.041	0.358	0.081	0.066	0.046	0.247	0.296	0.011	0.012	0.01	0.008	0.522	0.013	0.094	0.016	0.01	0.019	0.077	0.285	0.023	0.017	294	77.2	36.5	927	1.17	3099	2760	406
Cortex7714	ApoE 4 Female	43.8	8.31	0.146	0.165	0.018	0.012	0.179	0.017	0.117	0.037	0.019	0.146	0.027	0.017	0.027	0.018	0.013	0.05	0.011	0.04	0.352	0.098	0.068	0.042	0.248	0.263	0.012	0.014	0.01	0.008	0.472	0.01	0.087	0.015	0.009	0.022	0.066	0.239	0.025	0.017	436	50.8	41.3	758	3.29	4000	3394	417
Cortex7727	ApoE 4 Male	51.2	7.29	0.109	0.107	0.022	0.015	0.088	0.02	0.073	0.037	0.019	0.144	0.025	0.014	0.023	0.016	0.013	0.053	0.01	0.035	0.373	0.088	0.055	0.043	0.23	0.181	0.008	0.012	0.009	0.007	0.328	0.013	0.058	0.014	0.01	0.018	0.055	0.15	0.024	0.013	525	56.9	37.6	883	2.81	4293	3252	528
Cortex7733	ApoE 4 Female	41.9	9.74	0.134	0.128	0.016	0.018	0.138	0.019	0.125	0.038	0.019	0.185	0.029	0.015	0.023	0.015	0.01	0.054	0.009	0.041	0.257	0.083	0.067	0.043	0.172	0.239	0.013	0.013	0.01	0.008	0.42	0.013	0.079	0.012	0.011	0.021	0.066	0.22	0.024	0.015	359	43.6	29.7	850	0.895	3862	2832	410
CortexQC	QC	37.1	8.43	0.165	0.144	0.019	0.014	0.139	0.018	0.111	0.036	0.022	0.145	0.024	0.014	0.028	0.016	0.012	0.053	0.01	0.038	0.253	0.076	0.07	0.046	0.189	0.25	0.013	0.014	0.012	0.008	0.477	0.012	0.084	0.014	0.011	0.021	0.078	0.243	0.022	0.019	408	45.8	32.6	879	1.83	3433	3252	369
[truncated: 170 more columns]
